# Supplementary material for: Rescue of Vasopressin Synthesis in Magnocellular Neurons of the Supraoptic Nucleus Normalises Acute Stress-Induced Adrenocorticotropin Secretion and Unmasks an Effect on Social Behaviour in Male Vasopressin-Deficient Brattleboro Rats
Source: MDPI journal article supplement (doi:10.3390/ijms23031357), 2022-01-25
Supplement: s1 [file s1]

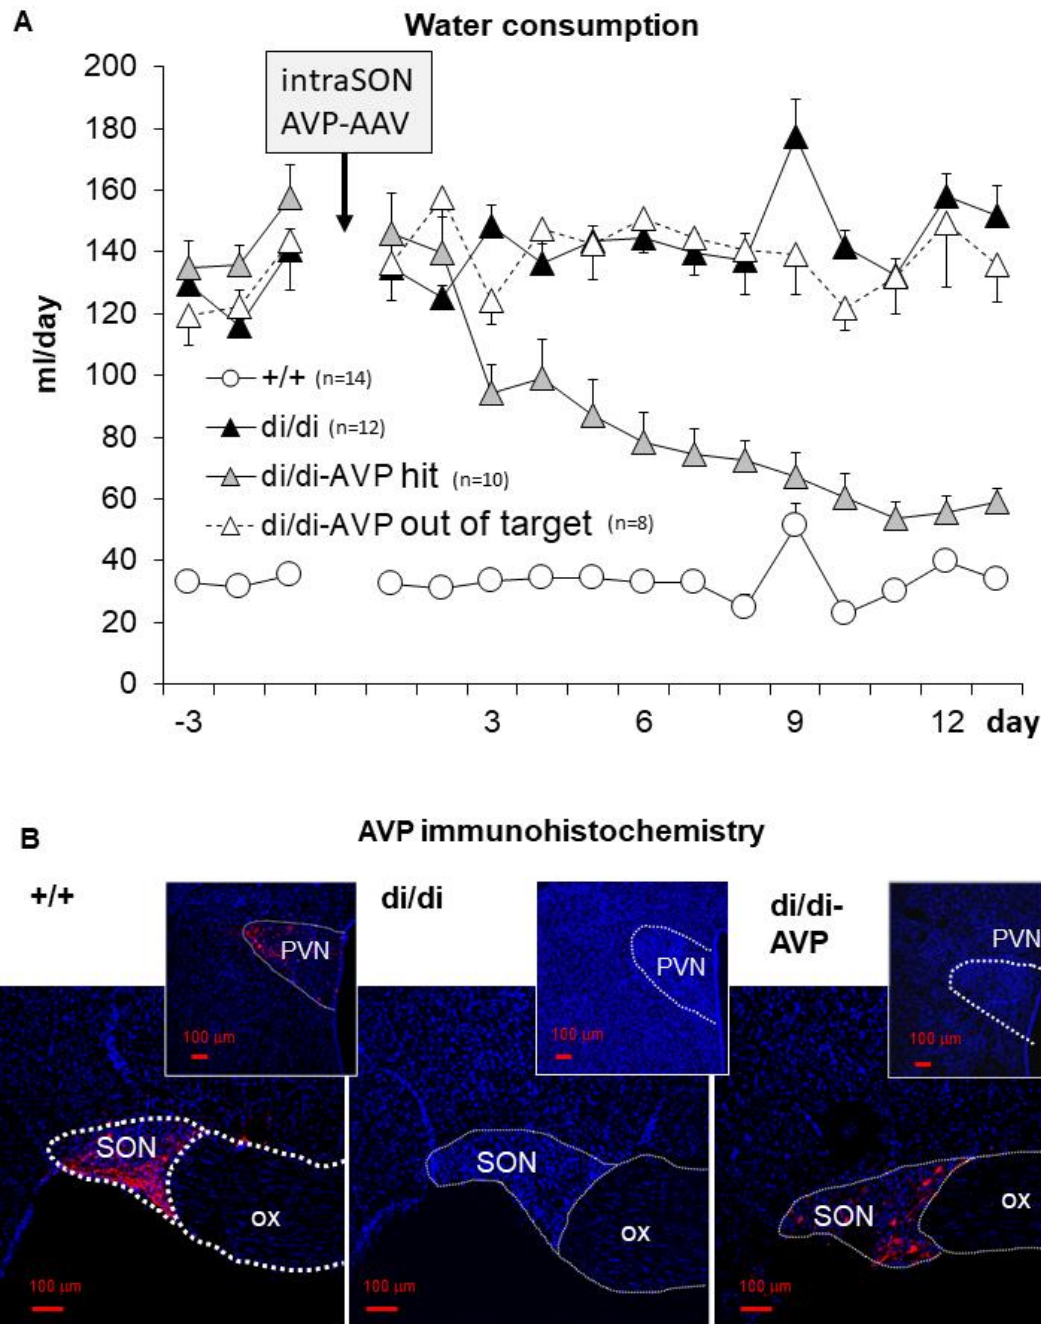

**Figure S1. Confirmation of virus-driven rescue of AVP synthesis in the SON of male Brattleboro rats.** (A) In line with previous results [25, 26] we confirmed that the high water consumption (mean  $\pm$  SEM) of di/di rats was significantly reduced in a subset of AVP-AAV treated animals. The AVP-AAV animals showing no drop in their water consumption were considered as “no hits” and were excluded from later analysis. The criterion for selection of the “hits” was a positive reduction in water consumption calculated according to the following formula:  $100 - (\text{average water consumption after operation}) / (\text{average water consumption before operation}) \times 100$ . (B) Microphotographs showing immunohistochemistry for AVP in the brain of representative +/+, di/di and di/di-AVP animals. In the latter AVP synthesis was restored by AVP-AAV treatment in the SON, but not in the PVN. Dotted lines are used to delineate the respective nucleus from the surrounding tissue. Abbreviations: AVP, vasopressin; AVP-AAV, adenoassociated viral vector containing vasopressin sequence; di/di, vasopressin-deficient Brattleboro rat; di/di-AVP, di/di animals with vasopressin synthesis rescue in the SON; OX, optical chiasm; PVN, paraventricular nucleus of the hypothalamus; SON, supraoptic nucleus.

**Table S1.** Body weight change during 14 days after AVP-AAV injection into the SON.

|             | +/+       | di/di     | di/di-AVP good | di/di-AVP bad |
|-------------|-----------|-----------|----------------|---------------|
| Body weight | 26.7±2.87 | 32.8±5.33 | 68.2±5.40*#    | 54.5±4.28*#\$ |
| gain (g)    | n=14      | n=12      | n=9            | n=8           |

Statistical analysis revealed significant difference between groups ( $F(3,39) = 18.16$ ,  $p < 0.01$ ).

\*  $p < 0.01$  significant difference from +/+, #  $p < 0.01$  significant difference from di/di, \$  $p < 0.01$  significant difference from di/di-AVP good.

**Table S2.** Individual resting ACTH and corticosterone levels in animals from Series 1 measured immediately before injection of egg white into the jugular vein.

| Number | Group | ACTH<br>(fmol/ml) | Corticosterone<br>(pmol/ml) |
|--------|-------|-------------------|-----------------------------|
| 9      | +/+   | 20.1              | *                           |
| 10     | +/+   | 1.5               | 239.2                       |
| 12     | +/+   | 4.6               | 385.2                       |
| 13     | +/+   | 3.7               | 386.9                       |
| 15     | +/+   | 1                 | 119.3                       |
| 16     | +/+   | 1                 | 24                          |
| 17     | +/+   | 1                 | 168                         |
| 37     | +/+   | 1                 | 114.4                       |
| 39     | +/+   | 1                 | *                           |
| 40     | +/+   | 2.8               | 331.2                       |
| 1      | di/di | 0.7               | 36.5                        |
| 7      | di/di | *                 | 228.7                       |
| 31     | di/di | 1                 | 22.5                        |
| 32     | di/di | 1                 | 134.9                       |
| 33     | di/di | 1                 | 73.7                        |
| 34     | di/di | 12                | *                           |
| 35     | di/di | 2.7               | 108.5                       |
| 36     | di/di | 1                 | 280                         |
| 41     | di/di | *                 | 17                          |
| 51     | di/di | 0.4               | 106.5                       |

|    |           |      |       |
|----|-----------|------|-------|
| 3  | di/di-AVP | 3.7  | 166   |
| 22 | di/di-AVP | 0.5  | 16.8  |
| 24 | di/di-AVP | 1.3  | 11.5  |
| 25 | di/di-AVP | 13.6 | 294.3 |
| 26 | di/di-AVP | 1    | 230.4 |
| 29 | di/di-AVP | 1    | 192.5 |
| 43 | di/di-AVP | 1    | 112.4 |
| 44 | di/di-AVP | 1.3  | 68.2  |

\*Due to technical reasons we could not detect both ACTH and corticosterone in all samples. No significant differences between the groups have been detected.

**Table S3.** Protocols for the immunohistochemical staining of the brain slices.

| <b>Protein/<br/>Peptide</b> | <b>Permeabilization</b>                                                       | <b>Blocking</b> | <b>Primary<br/>antibody</b>               | <b>Secondary antibody</b>                                                                                                                                                                                            |
|-----------------------------|-------------------------------------------------------------------------------|-----------------|-------------------------------------------|----------------------------------------------------------------------------------------------------------------------------------------------------------------------------------------------------------------------|
| AVP                         | 1 h, 0.5% Triton-X 100<br>+ 2% BSA                                            | no              | 72 h, a-AVP<br>1:100 000 in<br>2% BSA     | 1.5 h, a-rabbit Alexa 594<br>1:1000 in PBS                                                                                                                                                                           |
| c-Fos                       | 30 min, 0.5% Triton-X<br>100 and 0.5% H <sub>2</sub> O <sub>2</sub> in<br>PBS | 1 h, 2%<br>BSA  | 48 h, at 4°C a-<br>c-Fos 1:5000<br>in PBS | 1h a-rabbit biotinylated<br>1:500 at RT<br>1.5 h ABC 1:1000 in<br>0.05 M Tris buffer<br>followed by 0.2 mg/ml<br>DAB, 0.1% nickel–<br>ammonium sulfate and<br>0.003% H <sub>2</sub> O <sub>2</sub> in Tris<br>buffer |

Abbreviations: a-: anti, ABC: avidin–biotin complex, AVP: vasopressin, BSA: bovine serum albumine, DAB: 3'-diaminobenzidine tetrahydrochloride, H<sub>2</sub>O<sub>2</sub>: hydrogen peroxide, PBS: phosphate-buffered saline, RT: room temperature,

**Table S4.** Sequences used to the design of the primer pairs for RT-PCR.

| <b>Protein</b> | <b>forward sequence</b> | <b>reverse sequence</b> |
|----------------|-------------------------|-------------------------|
| <i>RPS18</i>   | TTCAGCACATCCTGCGAGTA    | TTGGTGAGGTCAATGTCTGC    |
| POMC           | GAGGTTAAGGAGCAGTGACTAAG | CGTCTATGGAGGTCTGAAGC    |
| V1b-R          | CTCTGCCGGGCTGTCAAGTA    | ATGGCCAGCAGCATGTAAGT    |
| CRH-R1         | TCGGGAGAAGGCTACCAGAC    | CCTGGATCGCTCCGACATC     |

Abbreviations: *RPS18*: *ribosomal protein S18*; POMC: proopiomelanocortin, the precursor of the adrenocorticotropin; V1b-R: the main AVP receptor on the anterior lobe of the pituitary; CRH-R1: the main corticotropin-releasing hormone receptor on the anterior lobe of the pituitary.
